# Supplementary material
Source: Research Square preprint supplement (doi:10.21203/rs.3.rs-9864210/v1)
Supplement: Supplementary file 1 [file 29779fabb136a655b8425abf.docx]

**Table S1.** Optimized bond lengths, bond angles, and dihedral angles of compounds 9 and 10.

| OPTIMIZED PARAMETRS OF COMPOUND 9 | | | | | | OPTIMIZED PARAMETRS OF COMPOUND 10 | | | | | |
| --- | --- | --- | --- | --- | --- | --- | --- | --- | --- | --- | --- |
| BOND LENGTH | | BOND ANGLE | | DIHEDRAL ANGLE | | BOND LENGTH | | BOND ANGLE | | DIHEDRAL ANGLE | |
| C2-C1 | 2.6574 | C3-C2-C1 | 88.11 | C4-C3-C2-C1 | -30.73 | C2-C1 | 2.3816 | C3-C2-C1 | 94.78 | C4-C3-C2-C1 | -17.92 |
| C3-C2 | 1.5531 | C4-C3-C2 | 108.65 | C5-C4-C3-C2 | 62.46 | C3-C2 | 1.5406 | C4-C3-C2 | 110.50 | C5-C4-C3-C2 | 36.75 |
| C4-C3 | 1.5085 | C5-C4-C3 | 113.48 | H6-C1-C5-C4 | -80.21 | C4-C3 | 1.5351 | C5-C4-C3 | 118.41 | H6-C1-C5-C4 | -68.04 |
| C5-C4 | 1.4983 | H6-C1-C5 | 108.68 | H7-H3-C2-C1 | 83.87 | C5-C4 | 1.5350 | H6-C1-C5 | 109.54 | H7-C3-C2-C1 | 101.06 |
| H6-C1 | 1.0961 | H7-C3-C2 | 107.49 | H8-H5-C4-C3 | 58.99 | H6-C1 | 1.0700 | H7-C3-C2 | 109.63 | H8-C5-C4-C3 | 83.19 |
| H7-C3 | 1.0977 | H8-C5-C4 | 107.90 | H9-H5-C4-C3 | 177.20 | H7-C3 | 1.0700 | H8-C5-C4 | 107.98 | H9-C5-C4-C3 | -157.01 |
| H8-C5 | 1.0948 | H9-C5-C4 | 111.92 | H10-C2-C1-C5 | -103.48 | H8-C5 | 1.0700 | H9-C5-C4 | 110.34 | H10-C2-C1-C5 | -109.19 |
| H9-C5 | 1.0879 | H10-C2-C1 | 105.35 | C11-C2-C1-C5 | 121.81 | H9-C5 | 1.0700 | H10-C2-C1 | 84.57 | C11-C2-C1-C5 | 133.23 |
| H10-C2 | 1.0955 | C11-C2-C1 | 133.41 | C12-C11-C2-C1 | 136.87 | H10-C2 | 1.0700 | C11-C2-C1 | 145.72 | C12-C11-C2-C1 | 80.70 |
| C11-C2 | 1.5205 | C12-C11-C2 | 120.10 | C13-C11-C2-C1 | -44.89 | C11-C2 | 1.5400 | C12-C11-C2 | 120.00 | C13-C11-C2-C1 | -99.30 |
| C12-C11 | 1.3956 | C13-C11-C2 | 121.13 | C14-C12-C11-C2 | 178.01 | C12-C11 | 1.4014 | C13-C11-C2 | 120.00 | C14-C12-C11-C2 | -180.00 |
| C13-C11 | 1.3985 | C14-C12-C11 | 120.77 | H15-C12-C11-C2 | -2.71 | C13-C11 | 1.4014 | C14-C12-C11 | 120.00 | H15-C12-C11-C2 | 0.00 |
| C14-C12 | 1.3941 | H15-C12-C11 | 119.51 | C16-C13-C11-C2 | -178.18 | C14-C12 | 1.4014 | H15-C12-C11 | 120.00 | C16-C13-C11-C2 | 180.00 |
| H15-C12 | 1.0848 | C16-C13-C11 | 120.68 | H17-H13-C11-C2 | 2.50 | H15-C12 | 1.0700 | C16-C13-C11 | 120.00 | H17-C13-C11-C2 | 0.00 |
| C16-C13 | 1.3919 | H17-C13-C11 | 119.96 | C18-C14-C12-C11 | 0.22 | C16-C13 | 1.4014 | H17-C13-C11 | 120.00 | C18-C14-C12-C11 | 0.00 |
| H17-C13 | 1.0845 | C18-C14-C12 | 120.08 | H19-H14-C12-C11 | 179.71 | H17-C13 | 1.0700 | C18-C14-C12 | 120.00 | H19-C14-C12-C11 | 180.00 |
| C18-C14 | 1.3925 | H19-C14-C12 | 119.77 | H20-C16-C13-C11 | -179.69 | C18-C14 | 1.4014 | H19-C14-C12 | 120.00 | H20-C16-C13-C11 | 180.00 |
| H19-C14 | 1.0842 | H20-C16-C13 | 119.79 | H21-H18-C14-C12 | 179.67 | H19-C14 | 1.0700 | H20-C16-C13 | 120.00 | H21-C18-C14-C12 | 180.00 |
| H20-C16 | 1.0843 | H21-C18-C14 | 120.25 | C22-C1-C5-C4 | 162.46 | H20-C16 | 1.0700 | H21-C18-C14 | 120.00 | C22-C1-C5-C4 | 172.23 |
| H21-C18 | 1.0841 | C22-C1-C5 | 109.13 | C23-C22-C1-C5 | 93.60 | H21-C18 | 1.0700 | C22-C1-C5 | 108.39 | C23-C22-C1-C5 | 149.26 |
| C22-C1 | 1.5236 | C23-C22-C1 | 119.33 | C24-C22-C1-C5 | -81.71 | C22-C1 | 1.5400 | C23-C22-C1 | 120.00 | C24-C22-C1-C5 | -30.74 |
| C23-C22 | 1.3964 | C24-C22-C1 | 121.63 | C25-C23-C22-C1 | -175.40 | C23-C22 | 1.4014 | C24-C22-C1 | 120.00 | C25-C23-C22-C1 | -180.00 |
| C24-C22 | 1.3964 | C25-C23-C22 | 120.67 | H26-H23-C22-C1 | 5.69 | C24-C22 | 1.4014 | C25-C23-C22 | 120.00 | H26-C23-C22-C1 | 0.00 |
| C25-C23 | 1.3928 | H26-C23-C22 | 119.60 | C27-C24-C22-C1 | 175.70 | C25-C23 | 1.4014 | H26-C23-C22 | 120.00 | C27-C24-C22-C1 | 180.00 |
| H26-C23 | 1.0853 | C27-C24-C22 | 120.57 | H28-C24-C22-C1 | -5.79 | H26-C23 | 1.0700 | C27-C24-C22 | 120.00 | H28-C24-C22-C1 | 0.00 |
| C27-C24 | 1.3933 | H28-C24-C22 | 119.79 | C29-C27-C24-C22 | -0.58 | C27-C24 | 1.4014 | H28-C24-C22 | 120.00 | C29-C27-C24-C22 | 0.00 |
| H28-C24 | 1.0842 | C29-C27-C24 | 120.23 | H30-C25-C23-C22 | -179.61 | H28-C24 | 1.0700 | C29-C27-C24 | 120.00 | H30-C25-C23-C22 | -180.00 |
| C29-C27 | 1.3937 | H30-C25-C23 | 119.73 | H31-H27-C24-C22 | 179.16 | C29-C27 | 1.4014 | H30-C25-C23 | 120.00 | H31-C27-C24-C22 | -180.00 |
| H30-C25 | 1.0843 | H31-C27-C24 | 119.71 | H32-H29-C27-C24 | 179.91 | H30-C25 | 1.0700 | H31-C27-C24 | 120.00 | H32-C29-C27-C24 | -180.00 |
| H31-C27 | 1.0844 | H32-C29-C27 | 120.25 | C33-C3-C2-C1 | -157.59 | H31-C27 | 1.0700 | H32-C29-C27 | 120.00 | C33-C3-C2-C1 | -139.11 |
| H32-C29 | 1.0840 | C33-C3-C2 | 110.92 | H34-C33-C3-C2 | -59.78 | H32-C29 | 1.0700 | C33-C3-C2 | 108.67 | H34-C33-C3-C2 | 60.49 |
| C33-C3 | 1.5300 | H34-C33-C3 | 110.52 | H35-H33-C3-C2 | 61.07 | C33-C3 | 1.5400 | H34-C33-C3 | 109.47 | N35-C1-C22-C23 | -88.92 |
| H34-C33 | 1.0910 | H35-C33-C3 | 111.25 | H36-C33-C3-C2 | -179.88 | H34-C33 | 1.0700 | N35-C1-C22 | 110.11 | N36-C4-C3-C2 | -144.91 |
| H35-C33 | 1.0921 | H36-C33-C3 | 110.17 | N37-C1-C22-C23 | -141.38 | N35-C1 | 1.4746 | N36-C4-C3 | 120.79 | N37-N35-C1-C22 | 53.91 |
| H36-C33 | 1.0909 | N37-C1-C22 | 112.61 | N38-C4-C3-C2 | -116.56 | N36-C4 | 1.2936 | N37-N35-C1 | 109.09 | O38-N37-N35-C1 | -91.29 |
| N37-C1 | 1.4864 | N38-C4-C3 | 119.20 | N39-N37-C1-C22 | 65.18 | N37-N35 | 1.4000 | O38-N37-N35 | 120.00 | O39-N36-C4-C3 | -179.15 |
| N38-C4 | 1.2748 | N39-N37-C1 | 117.73 | O40-N39-N37-C1 | -8.19 | O38-N37 | 1.1968 | O39-N36-C4 | 120.00 | H40-O39-N36-C4 | 150.00 |
| N39-N37 | 1.3502 | O40-N39-N37 | 115.65 | O41-N38-C4-C3 | 178.86 | O39-N36 | 1.3600 | H40-O39-N36 | 109.47 | C41-C33-C3-C2 | -179.51 |
| O40-N39 | 1.2169 | O41-N38-C4 | 112.68 | H42-O41-N38-C4 | 179.01 | H40-O39 | 0.9600 | C41-C33-C3 | 109.47 | H42-C41-C33-C3 | 180.00 |
| O41-N38 | 1.4107 | H42-O41-N38 | 102.48 | - | - | C41-C33 | 1.5400 | H42-C41-C33 | 109.47 | H43-C41-C33-C3 | -60.00 |
| H42-O41 | 0.9630 | - | - | - | - | H42-C41 | 1.0700 | H43-C41-C33 | 109.47 | H44-C41-C33-C3 | 60.00 |
| - | - | - | - | - | - | H43-C41 | 1.0700 | H44-C41-C33 | 109.47 | C45-C33-C3-C2 | -59.51 |
| - | - | - | - | - | - | H44-C41 | 1.0700 | C45-C33-C3 | 109.47 | H46-C45-C33-C3 | -60.00 |
| - | - | - | - | - | - | C45-C33 | 1.5400 | H46-C45-C33 | 109.47 | H47-C45-C33-C3 | 60.00 |
| - | - | - | - | - | - | H46-C45 | 1.0700 | H47-C45-C33 | 109.47 | H48-C45-C33-C3 | -180.00 |
| - | - | - | - | - | - | H47-C45 | 1.0700 | H48-C45-C33 | 109.47 | - | - |
| - | - | - | - | - | - | H48-C45 | 1.0700 | - | - | - |  |

**Table S2.** Mulliken atomic charges of compounds 9 and 10.

| MULLIKEN CHARGES | |
| --- | --- |
| COMPOUND 9 | COMPOUND10 |
| 1 C 0.1527 | 1 C -0.3628 |
| 2 C -0.2788 | 2 C -0.6217 |
| 3 C 0.2773 | 3 C -0.3764 |
| 4 C 0.2622 | 4 C 0.1110 |
| 5 C -1.1589 | 5 C -0.3686 |
| 6 H 0.1534 | 6 H 0.1898 |
| 7 H 0.1737 | 7 H 0.1485 |
| 8 H 0.2038 | 8 H 0.1613 |
| 9 H 0.2038 | 9 H 0.1878 |
| 10 H 0.1284 | 10 H 0.1414 |
| 11 C 0.7716 | 11 C -0.0245 |
| 12 C -0.1376 | 12 C -0.2182 |
| 13 C -0.6122 | 13 C 0.1350 |
| 14 C -0.2549 | 14 C -0.0630 |
| 15 H 0.1130 | 15 H 0.1292 |
| 16 C -0.4543 | 16 C -0.1338 |
| 17 H 0.1187 | 17 H 0.0963 |
| 18 C -0.1116 | 18 C -0.1815 |
| 19 H 0.1281 | 19 H 0.1291 |
| 20 H 0.1264 | 20 H 0.1257 |
| 21 H 0.1275 | 21 H 0.1278 |
| 22 C 0.8306 | 22 C 0.1731 |
| 23 C -0.0383 | 23 C 0.1619 |
| 24 C -0.3189 | 24 C -0.1922 |
| 25 C -0.3159 | 25 C -0.0325 |
| 26 H 0.1095 | 26 H 0.1141 |
| 27 C -0.5829 | 27 C -0.4246 |
| 28 H 0.1233 | 28 H 0.1258 |
| 29 C -0.0551 | 29 C -0.0168 |
| 30 H 0.1256 | 30 H 0.1253 |
| 31 H 0.1230 | 31 H 0.1263 |
| 32 H 0.1249 | 32 H 0.1235 |
| 33 C -0.635 | 33 C 0.3463 |
| 34 H 0.1657 | 34 H 0.1471 |
| 35 H 0.1677 | 35 N 0.6427 |
| 36 H 0.1559 | 36 N -0.4345 |
| 37 N 0.7192 | 37 N -0.2151 |
| 38 N -0.2847 | 38 O -0.0540 |
| 39 N -0.5554 | 39 O -0.1648 |
| 40 O 0.0186 | 40 H 0.3668 |
| 41 O -0.0822 | 41 C -0.6236 |
| 42 H 0.2719 | 42 H 0.1401 |
| - | 43 H 0.1684 |
| - | 44 H 0.1386 |
| - | 45 C -0.5164 |
| - | 46 H 0.1541 |
| - | 47 H 0.1416 |
| - | 48 H 0.1459 |

**Table S3.** TD-DFT-calculated electronic transitions of compounds 9 and 10.

| Compounds | Wavelength (nm) | epsilon | Oscillator Strength |
| --- | --- | --- | --- |
| 9 | 657.18 | 0.00111 | 6293.82 |
| 345.48 | 0.01595 | 89800.9 |
| 328.73 | 0.00517 | 29100.73 |
| 10 | 661.17 | 0.00105 | 6218.06 |
| 380.7 | 0.00767 | 45203.13 |
| 347.32 | 0.00103 | 6087.05 |

**Tables S4.** Simulated IR and Raman vibrational assignments of compound 9.

| Mode | Frequency | Infrared | Raman  activity | Depolar-P | Depolar-U |
| --- | --- | --- | --- | --- | --- |
| 1 | 54.66 | 1.1427 | 6.8612 | 0.7362 | 0.848 |
| 2 | 65.54 | 0.4776 | 2.7761 | 0.7079 | 0.8289 |
| 3 | 86.8 | 0.9677 | 2.2857 | 0.7409 | 0.8512 |
| 4 | 134.24 | 6.6346 | 0.9054 | 0.6921 | 0.818 |
| 5 | 159.67 | 0.9592 | 0.7158 | 0.303 | 0.4651 |
| 6 | 206.31 | 1.5641 | 0.8838 | 0.6163 | 0.7626 |
| 7 | 222.35 | 1.6342 | 2.0835 | 0.536 | 0.6979 |
| 8 | 245.63 | 4.7045 | 1.0661 | 0.4396 | 0.6107 |
| 9 | 249.94 | 2.5115 | 6.1074 | 0.4056 | 0.5772 |
| 10 | 258.87 | 18.6408 | 0.6718 | 0.4204 | 0.5919 |
| 11 | 259.99 | 3.796 | 2.765 | 0.5003 | 0.6669 |
| 12 | 304.15 | 2.6198 | 3.7332 | 0.6457 | 0.7847 |
| 13 | 317.39 | 0.7729 | 3.2329 | 0.1986 | 0.3314 |
| 14 | 341.86 | 16.5613 | 4.8314 | 0.2248 | 0.3671 |
| 15 | 388.59 | 1.1658 | 2.961 | 0.2184 | 0.3585 |
| 16 | 406.16 | 3.414 | 0.3902 | 0.7497 | 0.857 |
| 17 | 409.06 | 0.0466 | 0.1283 | 0.1612 | 0.2776 |
| 18 | 419.76 | 12.0987 | 1.0626 | 0.5213 | 0.6853 |
| 19 | 438.68 | 6.2575 | 0.3939 | 0.7135 | 0.8328 |
| 20 | 496.83 | 13.9113 | 0.8895 | 0.3249 | 0.4905 |
| 21 | 499.43 | 14.8256 | 1.6591 | 0.2237 | 0.3656 |
| 22 | 526.13 | 17.7622 | 0.568 | 0.3277 | 0.4936 |
| 23 | 584.13 | 6.0585 | 1.8058 | 0.5468 | 0.707 |
| 24 | 601.94 | 3.2775 | 1.7521 | 0.6962 | 0.8209 |
| 25 | 614.99 | 10.5121 | 1.6629 | 0.7345 | 0.8469 |
| 26 | 630.19 | 1.306 | 3.6352 | 0.743 | 0.8526 |
| 27 | 630.88 | 0.4513 | 4.2889 | 0.733 | 0.8459 |
| 28 | 651.46 | 58.9519 | 1.3609 | 0.5482 | 0.7081 |
| 29 | 655.94 | 49.4391 | 1.5574 | 0.1346 | 0.2372 |
| 30 | 675.78 | 6.9569 | 3.8491 | 0.096 | 0.1751 |
| 31 | 696.3 | 2.5655 | 2.0446 | 0.1846 | 0.3117 |
| 32 | 740.39 | 9.923 | 0.5989 | 0.7386 | 0.8496 |
| 33 | 763.99 | 8.3749 | 3.0055 | 0.4816 | 0.6501 |
| 34 | 767.59 | 3.1295 | 6.9039 | 0.5657 | 0.7226 |
| 35 | 784.86 | 0.8097 | 1.216 | 0.4925 | 0.66 |
| 36 | 786.99 | 1.6192 | 0.6656 | 0.7359 | 0.8479 |
| 37 | 797.81 | 4.2682 | 0.5817 | 0.7002 | 0.8237 |
| 38 | 847.33 | 7.775 | 18.326 | 0.2585 | 0.4108 |
| 39 | 872.36 | 4.6608 | 0.4178 | 0.7484 | 0.8561 |
| 40 | 880.22 | 8.4804 | 1.9006 | 0.1759 | 0.2992 |
| 41 | 889.93 | 3.5346 | 11.9129 | 0.0358 | 0.0691 |
| 42 | 895.28 | 9.8619 | 4.3414 | 0.1028 | 0.1865 |
| 43 | 931.15 | 1.3117 | 0.1493 | 0.6212 | 0.7663 |
| 44 | 933.69 | 0.2453 | 0.1763 | 0.1773 | 0.3012 |
| 45 | 951.01 | 8.9068 | 1.6255 | 0.75 | 0.8571 |
| 46 | 951.55 | 0.0224 | 0.0812 | 0.4187 | 0.5903 |
| 47 | 954.75 | 38.5179 | 5.7129 | 0.732 | 0.8453 |
| 48 | 1002.54 | 42.2355 | 5.3232 | 0.1524 | 0.2645 |
| 49 | 1007.51 | 45.6924 | 18.8971 | 0.1222 | 0.2178 |
| 50 | 1011.84 | 1.079 | 87.924 | 0.0407 | 0.0783 |
| 51 | 1017.03 | 59.7972 | 13.8322 | 0.3127 | 0.4764 |
| 52 | 1031.16 | 8.7145 | 15.526 | 0.0303 | 0.0587 |
| 53 | 1031.85 | 7.639 | 3.1294 | 0.5391 | 0.7005 |
| 54 | 1054.11 | 118.4649 | 8.9841 | 0.233 | 0.378 |
| 55 | 1068.68 | 13.1461 | 0.981 | 0.286 | 0.4448 |
| 56 | 1077.77 | 22.8297 | 1.9988 | 0.6305 | 0.7734 |
| 57 | 1089.92 | 73.4752 | 6.6723 | 0.4688 | 0.6383 |
| 58 | 1105.16 | 13.336 | 5.5207 | 0.6936 | 0.8191 |
| 59 | 1115.35 | 26.0739 | 1.727 | 0.5845 | 0.7378 |
| 60 | 1148.32 | 0.0254 | 3.4652 | 0.7405 | 0.8509 |
| 61 | 1148.59 | 0.0746 | 2.3836 | 0.743 | 0.8526 |
| 62 | 1152.85 | 10.8322 | 1.6849 | 0.6509 | 0.7885 |
| 63 | 1158.57 | 21.6413 | 6.3178 | 0.1064 | 0.1924 |
| 64 | 1171.74 | 5.5088 | 28.8047 | 0.1056 | 0.191 |
| 65 | 1178.25 | 1.8734 | 8.7462 | 0.4364 | 0.6076 |
| 66 | 1182.78 | 0.9226 | 26.6807 | 0.232 | 0.3766 |
| 67 | 1190.7 | 21.6805 | 0.8813 | 0.484 | 0.6523 |
| 68 | 1218.59 | 10.2687 | 7.3181 | 0.7482 | 0.856 |
| 69 | 1227.76 | 28.5561 | 4.0668 | 0.563 | 0.7204 |
| 70 | 1244.92 | 19.284 | 6.5179 | 0.522 | 0.6859 |
| 71 | 1257.53 | 4.7933 | 3.2376 | 0.7464 | 0.8548 |
| 72 | 1279.92 | 35.5585 | 2.384 | 0.7498 | 0.857 |
| 73 | 1293.5 | 3.5521 | 3.9069 | 0.2372 | 0.3834 |
| 74 | 1299.9 | 2.5616 | 1.8127 | 0.6783 | 0.8084 |
| 75 | 1303.57 | 4.4932 | 0.64 | 0.6528 | 0.7899 |
| 76 | 1307.83 | 13.0746 | 2.2498 | 0.5462 | 0.7065 |
| 77 | 1336.46 | 32.7671 | 15.5895 | 0.2578 | 0.41 |
| 78 | 1345.53 | 10.8681 | 7.9696 | 0.6073 | 0.7557 |
| 79 | 1349.97 | 1.7896 | 2.9274 | 0.7372 | 0.8487 |
| 80 | 1357.32 | 0.5941 | 14.8338 | 0.3125 | 0.4762 |
| 81 | 1364.25 | 20.7863 | 1.8901 | 0.5873 | 0.74 |
| 82 | 1428.86 | 4.2491 | 2.0541 | 0.6999 | 0.8235 |
| 83 | 1457.65 | 0.3141 | 2.2163 | 0.7484 | 0.8561 |
| 84 | 1458.69 | 11.7334 | 1.7624 | 0.3677 | 0.5377 |
| 85 | 1469.99 | 2.2063 | 3.0266 | 0.7485 | 0.8562 |
| 86 | 1479.27 | 7.6455 | 3.9815 | 0.7309 | 0.8446 |
| 87 | 1500.9 | 10.1065 | 0.225 | 0.4423 | 0.6133 |
| 88 | 1501.45 | 8.6629 | 0.3546 | 0.4464 | 0.6172 |
| 89 | 1600.35 | 0.29 | 14.9604 | 0.704 | 0.8263 |
| 90 | 1601.1 | 2.4706 | 12.8274 | 0.6187 | 0.7644 |
| 91 | 1606.66 | 1.1831 | 56.1385 | 0.4709 | 0.6403 |
| 92 | 1607 | 6.6021 | 23.6019 | 0.718 | 0.8359 |
| 93 | 1618.8 | 4.5272 | 30.363 | 0.2972 | 0.4582 |
| 94 | 1640.59 | 135.4225 | 28.1571 | 0.3055 | 0.468 |
| 95 | 3226.62 | 13.931 | 124.6768 | 0.0149 | 0.0293 |
| 96 | 3246.07 | 6.4862 | 25.6377 | 0.0717 | 0.1338 |
| 97 | 3249.71 | 29.0289 | 163.6231 | 0.064 | 0.1203 |
| 98 | 3253.72 | 12.9499 | 20.7983 | 0.1828 | 0.3091 |
| 99 | 3272.08 | 9.6169 | 32.2857 | 0.383 | 0.5538 |
| 100 | 3294.86 | 1.0715 | 30.6293 | 0.7106 | 0.8308 |
| 101 | 3295.55 | 0.5145 | 40.3169 | 0.7452 | 0.854 |
| 102 | 3301.31 | 1.299 | 110.6608 | 0.7418 | 0.8517 |
| 103 | 3303.62 | 2.5948 | 108.8434 | 0.7421 | 0.852 |
| 104 | 3307.61 | 9.9336 | 53.0437 | 0.5644 | 0.7215 |
| 105 | 3310.76 | 16.9606 | 44.2541 | 0.7497 | 0.8569 |
| 106 | 3313.88 | 14.2288 | 27.8033 | 0.6144 | 0.7611 |
| 107 | 3316.68 | 14.5982 | 20.0343 | 0.7468 | 0.855 |
| 108 | 3317.84 | 12.4612 | 36.9545 | 0.7161 | 0.8346 |
| 109 | 3321.24 | 15.0284 | 266.6339 | 0.0982 | 0.1788 |
| 110 | 3321.76 | 14.7256 | 99.067 | 0.2285 | 0.372 |
| 111 | 3322.95 | 12.6908 | 323.6774 | 0.1162 | 0.2082 |
| 112 | 3327.8 | 9.0156 | 111.2968 | 0.3191 | 0.4839 |
| 113 | 3866.1 | 171.2044 | 208.6188 | 0.2768 | 0.4336 |

**Tables S5.** Simulated IR and Raman vibrational assignments of compound 10.

| Mode | Frequency | Infrared | Raman activity | Depolar-P | Depolar-U |
| --- | --- | --- | --- | --- | --- |
| 1 | 54.47 | 0.6501 | 6.2983 | 0.742 | 0.8519 |
| 2 | 59.21 | 1.3441 | 2.4819 | 0.6945 | 0.8197 |
| 3 | 87.9 | 1.0233 | 2.626 | 0.6387 | 0.7796 |
| 4 | 116.6 | 6.3363 | 1.2771 | 0.6884 | 0.8154 |
| 5 | 149.59 | 1.2242 | 0.5267 | 0.2776 | 0.4346 |
| 6 | 174.76 | 1.4296 | 4.3355 | 0.5973 | 0.7479 |
| 7 | 199.61 | 1.1788 | 3.1501 | 0.6151 | 0.7617 |
| 8 | 202.14 | 2.0496 | 0.9512 | 0.4651 | 0.6349 |
| 9 | 219.66 | 6.2294 | 2.4755 | 0.7495 | 0.8568 |
| 10 | 247.49 | 4.1128 | 1.7991 | 0.2294 | 0.3732 |
| 11 | 248.94 | 9.4439 | 1.6944 | 0.1975 | 0.3298 |
| 12 | 254.48 | 2.4094 | 3.3205 | 0.7206 | 0.8376 |
| 13 | 295.75 | 1.4095 | 3.4849 | 0.5383 | 0.6998 |
| 14 | 315.38 | 8.9337 | 4.0367 | 0.2359 | 0.3818 |
| 15 | 330.81 | 21.917 | 1.8107 | 0.7033 | 0.8258 |
| 16 | 341.09 | 1.5712 | 5.2108 | 0.1008 | 0.1832 |
| 17 | 380.59 | 2.6982 | 2.6021 | 0.3943 | 0.5656 |
| 18 | 400.56 | 0.9531 | 0.5008 | 0.6502 | 0.788 |
| 19 | 408.16 | 0.8511 | 0.5395 | 0.7135 | 0.8328 |
| 20 | 419.15 | 4.3404 | 0.9782 | 0.4155 | 0.5871 |
| 21 | 442.86 | 1.0558 | 0.589 | 0.1306 | 0.231 |
| 22 | 462.53 | 6.5675 | 1.0279 | 0.7416 | 0.8516 |
| 23 | 468.42 | 1.6005 | 1.5637 | 0.3984 | 0.5698 |
| 24 | 505.86 | 15.4221 | 1.0772 | 0.5111 | 0.6765 |
| 25 | 518.99 | 9.7245 | 0.4557 | 0.7499 | 0.8571 |
| 26 | 532.06 | 13.9055 | 0.1902 | 0.6348 | 0.7766 |
| 27 | 590.02 | 4.5749 | 2.7068 | 0.4017 | 0.5732 |
| 28 | 600.19 | 5.7221 | 2.2287 | 0.5615 | 0.7192 |
| 29 | 606.93 | 8.9194 | 2.5635 | 0.2625 | 0.4158 |
| 30 | 629.83 | 2.5988 | 3.7842 | 0.7235 | 0.8396 |
| 31 | 631.3 | 2.1084 | 3.5076 | 0.6662 | 0.7996 |
| 32 | 636.19 | 17.9052 | 2.5067 | 0.6463 | 0.7851 |
| 33 | 655.67 | 56.1385 | 1.1462 | 0.2319 | 0.3764 |
| 34 | 669.78 | 30.3084 | 6.8095 | 0.1319 | 0.2331 |
| 35 | 702.59 | 9.8818 | 2.5776 | 0.3162 | 0.4805 |
| 36 | 706.8 | 23.2949 | 6.1391 | 0.3608 | 0.5303 |
| 37 | 743.96 | 13.2235 | 0.7835 | 0.2771 | 0.4339 |
| 38 | 770.6 | 8.8725 | 4.673 | 0.747 | 0.8552 |
| 39 | 784.91 | 0.2927 | 1.3055 | 0.304 | 0.4663 |
| 40 | 794.47 | 3.4995 | 3.7602 | 0.3552 | 0.5242 |
| 41 | 806.08 | 0.2352 | 3.5108 | 0.4036 | 0.5751 |
| 42 | 816.91 | 0.9559 | 0.7221 | 0.6609 | 0.7959 |
| 43 | 837.46 | 1.5244 | 7.9284 | 0.0581 | 0.1098 |
| 44 | 856.87 | 11.5488 | 16.4514 | 0.4216 | 0.5931 |
| 45 | 870.69 | 5.0232 | 0.6465 | 0.7182 | 0.836 |
| 46 | 878.91 | 10.4307 | 1.2071 | 0.1253 | 0.2227 |
| 47 | 890.43 | 7.0603 | 3.3646 | 0.0565 | 0.107 |
| 48 | 898.04 | 4.5443 | 0.5393 | 0.5389 | 0.7004 |
| 49 | 915.35 | 23.5364 | 4.8203 | 0.2747 | 0.431 |
| 50 | 930.35 | 11.5611 | 4.6646 | 0.073 | 0.1361 |
| 51 | 932.82 | 17.5476 | 10.3211 | 0.0759 | 0.1412 |
| 52 | 944.29 | 0.3898 | 0.2368 | 0.2848 | 0.4433 |
| 53 | 951.79 | 0.0352 | 0.0869 | 0.3811 | 0.5519 |
| 54 | 964.32 | 20.6616 | 5.1438 | 0.7172 | 0.8353 |
| 55 | 977.03 | 9.6979 | 1.1159 | 0.6547 | 0.7913 |
| 56 | 1004.41 | 89.981 | 29.378 | 0.0885 | 0.1626 |
| 57 | 1008.88 | 24.9371 | 22.7576 | 0.1028 | 0.1864 |
| 58 | 1011.92 | 1.5633 | 72.1298 | 0.0584 | 0.1104 |
| 59 | 1030.19 | 8.452 | 1.1943 | 0.7478 | 0.8557 |
| 60 | 1031.11 | 4.8737 | 16.3382 | 0.0267 | 0.052 |
| 61 | 1043.85 | 9.8249 | 4.7611 | 0.6354 | 0.7771 |
| 62 | 1068.36 | 8.9104 | 0.8641 | 0.2423 | 0.3901 |
| 63 | 1076.34 | 35.3323 | 1.3116 | 0.7474 | 0.8554 |
| 64 | 1095.68 | 105.9847 | 1.334 | 0.7497 | 0.857 |
| 65 | 1097.12 | 7.3667 | 15.4821 | 0.4168 | 0.5883 |
| 66 | 1109.39 | 34.1151 | 2.6444 | 0.6953 | 0.8203 |
| 67 | 1120.02 | 4.403 | 1.9688 | 0.6485 | 0.7868 |
| 68 | 1148.04 | 1.5103 | 3.1243 | 0.7095 | 0.8301 |
| 69 | 1148.36 | 0.8726 | 2.6079 | 0.7275 | 0.8423 |
| 70 | 1149.42 | 40.157 | 2.5761 | 0.6798 | 0.8094 |
| 71 | 1155.08 | 23.6875 | 2.094 | 0.6374 | 0.7785 |
| 72 | 1163.75 | 5.8971 | 15.8089 | 0.1804 | 0.3057 |
| 73 | 1171.86 | 2.9333 | 17.4216 | 0.076 | 0.1413 |
| 74 | 1177.55 | 4.7992 | 4.6205 | 0.749 | 0.8565 |
| 75 | 1180.15 | 0.9936 | 35.659 | 0.1542 | 0.2672 |
| 76 | 1195.77 | 14.6508 | 1.4576 | 0.3578 | 0.527 |
| 77 | 1219.33 | 15.3652 | 9.9687 | 0.7293 | 0.8435 |
| 78 | 1227.83 | 43.9011 | 4.7693 | 0.6876 | 0.8149 |
| 79 | 1228.88 | 4.6148 | 2.2419 | 0.6019 | 0.7515 |
| 80 | 1250.92 | 10.4596 | 2.0775 | 0.3146 | 0.4786 |
| 81 | 1273.12 | 19.012 | 1.0312 | 0.384 | 0.5549 |
| 82 | 1280.08 | 19.1627 | 4.02 | 0.7332 | 0.8461 |
| 83 | 1287.04 | 0.5386 | 1.1154 | 0.3894 | 0.5606 |
| 84 | 1296.54 | 11.3955 | 3.9073 | 0.5432 | 0.704 |
| 85 | 1301.49 | 6.0576 | 4.0307 | 0.7456 | 0.8543 |
| 86 | 1303.61 | 19.8995 | 4.487 | 0.6012 | 0.7509 |
| 87 | 1320.76 | 12.4473 | 6.2237 | 0.7048 | 0.8269 |
| 88 | 1337.38 | 36.5469 | 12.3453 | 0.2304 | 0.3745 |
| 89 | 1347.01 | 13.92 | 7.5018 | 0.4864 | 0.6545 |
| 90 | 1349.83 | 0.2542 | 2.5103 | 0.6017 | 0.7513 |
| 91 | 1356.49 | 18.4415 | 2.2548 | 0.6473 | 0.7859 |
| 92 | 1357.97 | 2.2645 | 12.2536 | 0.3732 | 0.5435 |
| 93 | 1378.91 | 14.0163 | 3.5821 | 0.1984 | 0.331 |
| 94 | 1428.81 | 4.1471 | 2.1197 | 0.7133 | 0.8327 |
| 95 | 1455.11 | 4.3541 | 1.9093 | 0.67 | 0.8024 |
| 96 | 1458.31 | 8.8683 | 2.4027 | 0.5182 | 0.6827 |
| 97 | 1459.61 | 11.486 | 3.674 | 0.6905 | 0.8169 |
| 98 | 1499.07 | 10.4556 | 1.8926 | 0.5971 | 0.7477 |
| 99 | 1501 | 8.4884 | 0.4054 | 0.4294 | 0.6008 |
| 100 | 1513.59 | 5.994 | 10.6299 | 0.7476 | 0.8556 |
| 101 | 1518.3 | 13.2027 | 5.6918 | 0.7483 | 0.856 |
| 102 | 1558.54 | 18.2915 | 15.4828 | 0.5499 | 0.7096 |
| 103 | 1595.6 | 0.7855 | 23.2228 | 0.5958 | 0.7467 |
| 104 | 1600.48 | 1.162 | 16.7462 | 0.5919 | 0.7437 |
| 105 | 1604.32 | 8.7459 | 30.6668 | 0.5236 | 0.6873 |
| 106 | 1606.85 | 2.4329 | 43.6626 | 0.5085 | 0.6741 |
| 107 | 1613.84 | 7.1925 | 24.5502 | 0.3671 | 0.537 |
| 108 | 1640.43 | 139.8501 | 34.27 | 0.3058 | 0.4684 |
| 109 | 3208.61 | 8.4591 | 38.1155 | 0.3314 | 0.4978 |
| 110 | 3213.46 | 129.632 | 386.2844 | 0.0548 | 0.1039 |
| 111 | 3245.8 | 6.3962 | 25.1805 | 0.0652 | 0.1225 |
| 112 | 3248.8 | 26.7806 | 124.1559 | 0.0644 | 0.1211 |
| 113 | 3253.65 | 10.7092 | 26.3437 | 0.1601 | 0.276 |
| 114 | 3258.94 | 9.6781 | 87.7072 | 0.2951 | 0.4557 |
| 115 | 3273.28 | 17.9663 | 8.163 | 0.6768 | 0.8073 |
| 116 | 3293.85 | 9.2796 | 37.896 | 0.4927 | 0.6602 |
| 117 | 3294.92 | 1.177 | 31.2069 | 0.7017 | 0.8247 |
| 118 | 3296.19 | 7.3998 | 38.7712 | 0.6622 | 0.7968 |
| 119 | 3301.26 | 0.9494 | 112.0377 | 0.7387 | 0.8497 |
| 120 | 3301.9 | 5.4489 | 104.8409 | 0.6529 | 0.79 |
| 121 | 3303.79 | 26.5277 | 108.1225 | 0.6636 | 0.7978 |
| 122 | 3307.46 | 9.6669 | 52.8805 | 0.554 | 0.713 |
| 123 | 3308.21 | 10.3493 | 33.6949 | 0.5259 | 0.6893 |
| 124 | 3310.93 | 55.2946 | 53.528 | 0.6373 | 0.7784 |
| 125 | 3313.87 | 13.4729 | 29.1023 | 0.6383 | 0.7792 |
| 126 | 3314.19 | 16.0971 | 41.7594 | 0.4196 | 0.5912 |
| 127 | 3321.33 | 17.1918 | 268.0863 | 0.097 | 0.1768 |
| 128 | 3321.79 | 11.8581 | 361.3132 | 0.1095 | 0.1974 |
| 129 | 3324.66 | 24.1083 | 34.8094 | 0.3494 | 0.5179 |
| 130 | 3327.7 | 8.2901 | 107.0085 | 0.3545 | 0.5234 |
| 131 | 3862.73 | 152.6894 | 206.1165 | 0.2773 | 0.4342 |
